# Supplementary material
Source: publisher figshare collection journal article supplement (https://frontiersin.figshare.com/ndownloader/files/21769371)
Supplement: Supplementary file [file 21769371]

# Johns Hopkins University

## Vestibular Rehabilitation Exercise and Compliance Log

### Week 1 Level A Home Exercise Program:

|   | Name:                                                                                                                  | Time    | Sun  | Mon  | Tue  | Wed  | Thurs | Fri  | Sat  |
|---|------------------------------------------------------------------------------------------------------------------------|---------|------|------|------|------|-------|------|------|
|   | Date:                                                                                                                  | Minutes | Time | Time | Time | Time | Time  | Time | Time |
| 1 | X 1 viewing in standing, horizontal direction, target arms length away, feet in a comfortable position                 | 1.5     |      |      |      |      |       |      |      |
|   |                                                                                                                        |         |      |      |      |      |       |      |      |
|   |                                                                                                                        |         |      |      |      |      |       |      |      |
| 2 | X 1 viewing in standing, vertical direction, target arms length away, feet in a comfortable position                   | 1.5     |      |      |      |      |       |      |      |
|   |                                                                                                                        |         |      |      |      |      |       |      |      |
|   |                                                                                                                        |         |      |      |      |      |       |      |      |
| 3 | Static stance in corner of room with feet positioned together, arms crossed                                            | 1.5     |      |      |      |      |       |      |      |
|   |                                                                                                                        |         |      |      |      |      |       |      |      |
|   |                                                                                                                        |         |      |      |      |      |       |      |      |
| 4 | Static stance in corner of room with feet together, looking up at the ceiling                                          | 1.5     |      |      |      |      |       |      |      |
|   |                                                                                                                        |         |      |      |      |      |       |      |      |
|   |                                                                                                                        |         |      |      |      |      |       |      |      |
| 5 | Walking (stepping) with feet close together, in a more narrowed base of support, arms crossed, looking straight ahead  | 1.5     |      |      |      |      |       |      |      |
|   |                                                                                                                        |         |      |      |      |      |       |      |      |
|   |                                                                                                                        |         |      |      |      |      |       |      |      |
| 6 | Walking with slow horizontal head movement (1 head turn every two steps), gazing to right and left with each head turn | 1.5     |      |      |      |      |       |      |      |
|   |                                                                                                                        |         |      |      |      |      |       |      |      |
|   |                                                                                                                        |         |      |      |      |      |       |      |      |
|   | Walk outside for exercise 10-15 minutes.                                                                               |         |      |      |      |      |       |      |      |
|   |                                                                                                                        |         |      |      |      |      |       |      |      |
|   | Total Time Duration                                                                                                    |         |      |      |      |      |       |      |      |

Comments:

**Johns Hopkins University**  
**Vestibular Rehabilitation Exercise and Compliance Log**

**Week 1 Level B Home Exercise Program:**

|   | Name:                                                                                                             | Time    | Sun  | Mon  | Tue  | Wed  | Thurs | Fri  | Sat  |
|---|-------------------------------------------------------------------------------------------------------------------|---------|------|------|------|------|-------|------|------|
|   | Date:                                                                                                             | Minutes | Time | Time | Time | Time | Time  | Time | Time |
| 1 | X 1 viewing in standing, target arms length away, horizontal direction, semi overlapped foot position             | 1.5     |      |      |      |      |       |      |      |
|   |                                                                                                                   |         |      |      |      |      |       |      |      |
|   |                                                                                                                   |         |      |      |      |      |       |      |      |
| 2 | X 1 viewing in standing, target arms length away, vertical direction, semi overlapped foot position               | 1.5     |      |      |      |      |       |      |      |
|   |                                                                                                                   |         |      |      |      |      |       |      |      |
|   |                                                                                                                   |         |      |      |      |      |       |      |      |
| 3 | Static stance in corner of room with feet semi overlapped, arms crossed                                           | 1.5     |      |      |      |      |       |      |      |
|   |                                                                                                                   |         |      |      |      |      |       |      |      |
|   |                                                                                                                   |         |      |      |      |      |       |      |      |
| 4 | Static stance in corner of room with feet overlapped, arms crossed, looking up to the ceiling.                    | 1.5     |      |      |      |      |       |      |      |
|   |                                                                                                                   |         |      |      |      |      |       |      |      |
|   |                                                                                                                   |         |      |      |      |      |       |      |      |
| 5 | Walking (stepping) with feet close together and overlapped, arms crossed, looking straight ahead                  | 1.5     |      |      |      |      |       |      |      |
|   |                                                                                                                   |         |      |      |      |      |       |      |      |
|   |                                                                                                                   |         |      |      |      |      |       |      |      |
| 6 | Walking with horizontal head movement in a narrowed base of support, gazing to right and left with each head turn | 1.5     |      |      |      |      |       |      |      |
|   |                                                                                                                   |         |      |      |      |      |       |      |      |
|   |                                                                                                                   |         |      |      |      |      |       |      |      |
|   | Walk outside for exercise 10-15 minutes.                                                                          |         |      |      |      |      |       |      |      |
|   | Total Time Duration                                                                                               |         |      |      |      |      |       |      |      |

Comments:

**Johns Hopkins University**  
**Vestibular Rehabilitation Exercise and Compliance Log**

**Week 1 Level C Home Exercise Program:**

|   | Name:                                                                                                                                        | Time    | Sun  | Mon  | Tue  | Wed  | Thurs | Fri  | Sat  |
|---|----------------------------------------------------------------------------------------------------------------------------------------------|---------|------|------|------|------|-------|------|------|
|   | Date:                                                                                                                                        | Minutes | Time | Time | Time | Time | Time  | Time | Time |
| 1 | X 1 viewing, horizontal direction, target arms length away, with one foot on ground, one foot on step                                        | 1.5     |      |      |      |      |       |      |      |
|   |                                                                                                                                              |         |      |      |      |      |       |      |      |
|   |                                                                                                                                              |         |      |      |      |      |       |      |      |
| 2 | X 1 viewing, vertical direction, target arms length away, with one foot on ground, one foot on step                                          | 1.5     |      |      |      |      |       |      |      |
|   |                                                                                                                                              |         |      |      |      |      |       |      |      |
|   |                                                                                                                                              |         |      |      |      |      |       |      |      |
| 3 | Static stance in corner of room with feet semi overlapped, arms crossed                                                                      | 1.5     |      |      |      |      |       |      |      |
|   |                                                                                                                                              |         |      |      |      |      |       |      |      |
|   |                                                                                                                                              |         |      |      |      |      |       |      |      |
| 4 | Semi tandem stance in corner of room with feet in semi overlapped position, head tilt up to the ceiling, standing on tip toes, arms crossed. | 1.5     |      |      |      |      |       |      |      |
|   |                                                                                                                                              |         |      |      |      |      |       |      |      |
|   |                                                                                                                                              |         |      |      |      |      |       |      |      |
| 5 | Walking with feet semi overlapped, arms crossed, with deliberate horizontal head turns every 1-2 steps                                       | 1.5     |      |      |      |      |       |      |      |
|   |                                                                                                                                              |         |      |      |      |      |       |      |      |
|   |                                                                                                                                              |         |      |      |      |      |       |      |      |
| 6 | Walking with horizontal head movement every step while counting backwards from 100 by 3s                                                     | 1.5     |      |      |      |      |       |      |      |
|   |                                                                                                                                              |         |      |      |      |      |       |      |      |
|   |                                                                                                                                              |         |      |      |      |      |       |      |      |
|   | Walk outside for exercise 10-15 minutes.                                                                                                     |         |      |      |      |      |       |      |      |
|   | Total Time duration                                                                                                                          |         |      |      |      |      |       |      |      |

Comments:
